# Supplementary material
Source: Research Square preprint supplement (doi:10.21203/rs.3.rs-9289041/v1)
Supplement: Supplementary file 1 [file 85c24480f05a81e6d1c2728d.xlsx]

## Sheet: Sheet1
Table S1 cis-motif and sequence by TF-centered Y1H assay.
cis-motif	Extract sequence	Potential target genes
		TF	R
AT-rich motif	TATATTC	405	626
CACT-motif	CACTTCT	176	307
RAV1-binding site	AACAGAA	273	478
